# Supplementary material for: Zn0.4Mg0.6Fe2O4 nanoenzyme: a novel chemo-sensitizer for the chemotherapy treatment of oral squamous cell carcinoma
Source: Royal Society of Chemistry journal article supplement (doi:10.1039/d2na00750a), 2022-12-28
Supplement: d2na00750a1.pdf [file d2na00750a1.pdf]

## Zn<sub>0.4</sub>Mg<sub>0.6</sub>Fe<sub>2</sub>O<sub>4</sub> nanoenzyme: a novel chemo-sensitizer for the chemotherapy treatment of Oral Squamous Cell Carcinoma

Liang Chen,<sup>‡a</sup> Qingmei Kong,<sup>‡b</sup> Mingxing Tian<sup>a</sup>, Qian Zhang,<sup>b</sup> Chengwan Xia,<sup>\*b</sup> and Chao Deng<sup>\*c</sup>

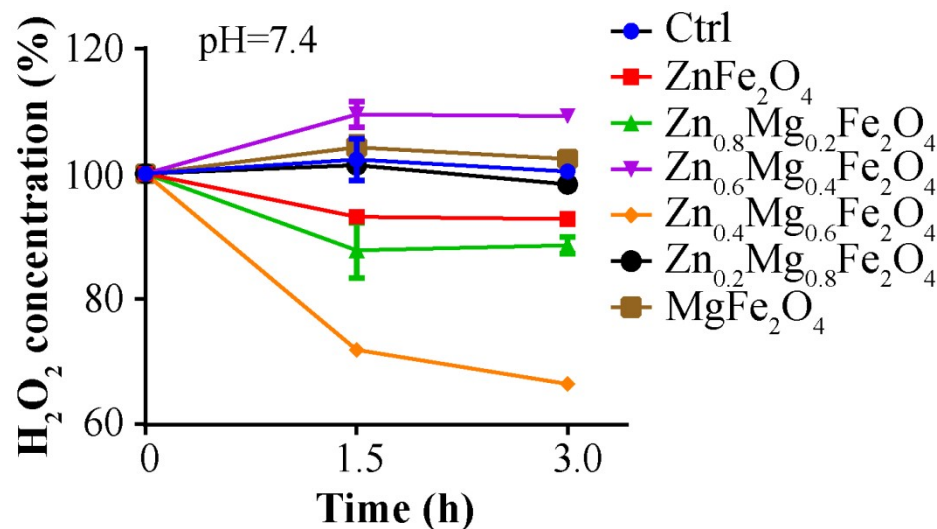

Fig.S1 Continues H<sub>2</sub>O<sub>2</sub> consumption after treating with Zn<sub>1-x</sub>Mg<sub>x</sub>Fe<sub>2</sub>O<sub>4</sub> under neutral environment.

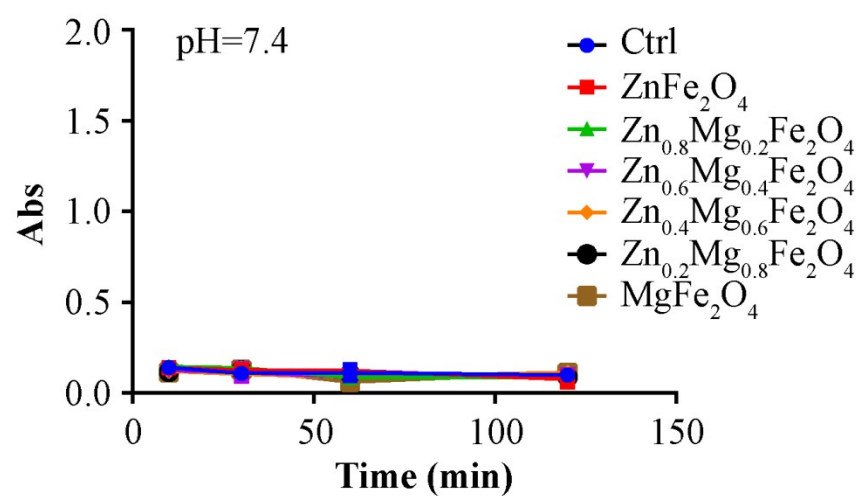

Fig.S2 Continues ROS generation after treating with Zn<sub>1-x</sub>Mg<sub>x</sub>Fe<sub>2</sub>O<sub>4</sub> under neutral environment.

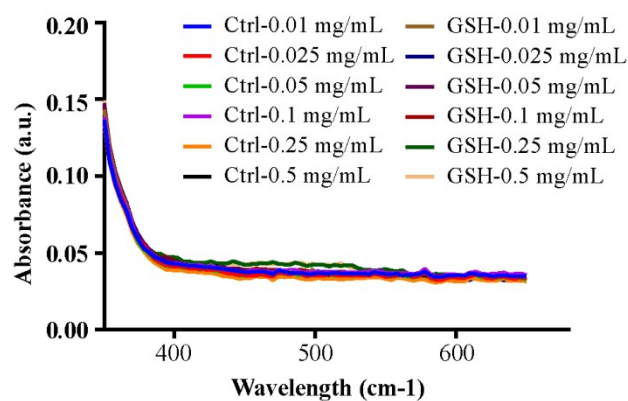

Fig.S3  $\text{Fe}^{2+}$  generation after treating with different concentration of  $\text{Zn}_{0.4}\text{Mg}_{0.6}\text{Fe}_2\text{O}_4$  under neutral environment.
